# Supplementary material
Source: PubMed Central journal article supplement (PMC7117924)

## Supplemental material

### Supplemental Tables

Table S1. Overview of the metaproteomics results across samples

| Samples                    | Total Spectrum | Peptide-Spectrum Matches | Peptide sequences | Proteins | Protein groups |
|----------------------------|----------------|--------------------------|-------------------|----------|----------------|
| <i>Jiuqu</i> & FG00 & FG03 | 499, 255       | 97, 198                  | 15, 228           | 5, 311   | 2, 373         |

Table S2. Identified non-redundant protein groups across samples as an Excel file: Table\_S2.xls in data sheet 1.

Table S3. Distribution of the identified non-redundant protein groups into Clusters of Orthologous Groups by the metaproteomics analysis.

| Type                               | Functional categories               | Number of proteins |
|------------------------------------|-------------------------------------|--------------------|
| Information storage and processing | [A] RNA processing and modification | 1                  |

|                                    |                                                                   |     |
|------------------------------------|-------------------------------------------------------------------|-----|
| Information storage and processing | [B] Chromatin structure and dynamics                              | 4   |
| Information storage and processing | [J] Translation, ribosomal structure and biogenesis               | 235 |
| Information storage and processing | [K] Transcription                                                 | 22  |
| Information storage and processing | [L] Replication, recombination and repair                         | 16  |
| Cellular processes and signaling   | [D] Cell cycle control, cell division, chromosome partitioning    | 9   |
| Cellular processes and signaling   | [M] Cell wall/membrane/envelope biogenesis                        | 28  |
| Cellular processes and signaling   | [O] Posttranslational modification, protein turnover, chaperones  | 234 |
| Cellular processes and signaling   | [T] Signal transduction mechanisms                                | 25  |
| Cellular processes and signaling   | [U] Intracellular trafficking, secretion, and vesicular transport | 8   |
| Cellular processes and signaling   | [Z] Cytoskeleton                                                  | 36  |
| Metabolism                         | [C] Energy production and conversion                              | 329 |
| Metabolism                         | [E] Amino acid transport and metabolism                           | 149 |
| Metabolism                         | [F] Nucleotide transport and metabolism                           | 42  |

|                      |                                                                  |     |
|----------------------|------------------------------------------------------------------|-----|
| Metabolism           | [G] Carbohydrate transport and metabolism                        | 338 |
| Metabolism           | [H] Coenzyme transport and metabolism                            | 69  |
| Metabolism           | [I] Lipid transport and metabolism                               | 69  |
| Metabolism           | [P] Inorganic ion transport and metabolism                       | 54  |
| Metabolism           | [Q] Secondary metabolites biosynthesis, transport and catabolism | 23  |
| Poorly characterized | [R] General function prediction only                             | 121 |
| Poorly characterized | [S] Function unknown                                             | 7   |

---

Table S4. Distribution of carbohydrate hydrolases across samples as an Excel file: Table\_S4.xls in data sheet 2.

Table S5. Bacterial and fungal microbiota diversity index based on 16S rRNA and ITS amplicons sequencing across samples

| ID       | Sample          | Clean_reads | OTUs | Goods' coverage | Chao1 richness | Shannon diversity index |
|----------|-----------------|-------------|------|-----------------|----------------|-------------------------|
| Bacteria | <i>Jiuqu_01</i> | 31802       | 229  | 0.9944          | 319.91         | 3.50                    |

|                 |       |     |        |        |      |
|-----------------|-------|-----|--------|--------|------|
| <i>Jiuqu_02</i> | 32917 | 241 | 0.9940 | 302.23 | 3.35 |
| <i>Jiuqu_03</i> | 36227 | 239 | 0.9941 | 313.87 | 3.84 |
| FG00_01         | 28263 | 248 | 0.9938 | 306.50 | 4.09 |
| FG00_02         | 21263 | 226 | 0.9944 | 302.81 | 4.05 |
| FG00_03         | 39094 | 233 | 0.9946 | 289.98 | 4.10 |
| FG03_01         | 37735 | 155 | 0.9942 | 243.56 | 2.90 |
| FG03_02         | 14624 | 94  | 0.9963 | 212.75 | 2.93 |
| FG03_03         | 25433 | 141 | 0.9962 | 183.01 | 3.15 |
| FG05_01         | 16004 | 134 | 0.9963 | 176.55 | 2.03 |
| FG05_02         | 19666 | 135 | 0.9959 | 190.73 | 2.09 |
| FG05_03         | 18722 | 131 | 0.9955 | 254.44 | 2.19 |
| FG10_01         | 18556 | 108 | 0.9961 | 171.77 | 1.69 |
| FG10_02         | 19834 | 110 | 0.9966 | 152.83 | 1.80 |

|       |                 |       |     |        |        |      |
|-------|-----------------|-------|-----|--------|--------|------|
|       | FG10_03         | 21504 | 134 | 0.9959 | 189.34 | 1.57 |
|       | FG15_01         | 23107 | 230 | 0.9931 | 323.07 | 2.92 |
|       | FG15_02         | 20310 | 116 | 0.9960 | 259.29 | 2.23 |
|       | FG15_03         | 25347 | 219 | 0.9926 | 355.72 | 2.40 |
|       | <i>Jiuqu_01</i> | 44094 | 50  | 0.9992 | 66.07  | 2.12 |
|       | <i>Jiuqu_02</i> | 41630 | 65  | 0.9989 | 96.47  | 2.25 |
|       | <i>Jiuqu_03</i> | 39092 | 55  | 0.9990 | 78.29  | 2.29 |
|       | FG00_01         | 26798 | 88  | 0.9988 | 96.09  | 2.80 |
| Fungi | FG00_02         | 29079 | 74  | 0.9991 | 79.92  | 2.99 |
|       | FG00_03         | 32663 | 74  | 0.9987 | 102.73 | 2.46 |
|       | FG03_01         | 29963 | 42  | 0.9993 | 52.29  | 1.59 |
|       | FG03_02         | 25953 | 51  | 0.9988 | 81.18  | 1.46 |
|       | FG03_03         | 33619 | 45  | 0.9991 | 78.93  | 1.48 |

---

|         |       |    |        |       |      |
|---------|-------|----|--------|-------|------|
| FG05_01 | 28584 | 34 | 0.9995 | 40.24 | 0.64 |
| FG05_02 | 20186 | 36 | 0.9995 | 38.54 | 0.76 |
| FG05_03 | 42702 | 27 | 0.9995 | 33.11 | 0.60 |
| FG10_01 | 28168 | 43 | 0.9993 | 63.26 | 2.16 |
| FG10_02 | 22844 | 73 | 0.9992 | 78.72 | 2.20 |
| FG10_03 | 23843 | 47 | 0.9992 | 58.41 | 2.39 |
| FG15_01 | 18753 | 36 | 0.9992 | 57.45 | 0.73 |
| FG15_02 | 19821 | 39 | 0.9992 | 53.34 | 0.80 |
| FG15_03 | 27512 | 36 | 0.9992 | 47.10 | 0.58 |

Table S6. The relative abundance of bacterial and fungal genera across samples

| ID | Genus | Relative abundance (% , mean $\pm$ sd) |      |      |      |      |      |
|----|-------|----------------------------------------|------|------|------|------|------|
|    |       | <i>Jiuqu</i>                           | FG00 | FG03 | FG05 | FG10 | FG15 |

|          |                      |            |            |             |           |            |            |
|----------|----------------------|------------|------------|-------------|-----------|------------|------------|
|          | <i>Acetobacter</i>   | 0.95±0.45  | 1.28±0.36  | 0.24±0.11   | 0.11±0.08 | 0.05±0.02  | 0.07±0.05  |
|          | <i>Acinetobacter</i> | 0.97±0.58  | 1.12±0.27  | 1.69±2.51   | 0.28±0.06 | 0.14±0.10  | 0.26±0.10  |
|          | <i>Bacillus</i>      | 0.47±0.2   | 0.64±0.10  | 0.12±0.14   | 0.01±0.00 | 0.02±0.01  | 0.11±0.11  |
|          | <i>Klebsiella</i>    | 1.20±0.07  | 5.52±2.06  | 7.88±2.55   | 1.05±1.15 | 0.91±0.34  | 0.40±0.14  |
| Bacteria | <i>Lactobacillus</i> | 27.33±3.00 | 21.58±1.33 | 61.24±18.10 | 86.31±1.2 | 93.94±1.42 | 90.63±3.46 |
|          | <i>Pantoea</i>       | 0.23±0.03  | 0.86±0.16  | 2.62±3.49   | 0.17±0.21 | 0.12±0.07  | 0.05±0.03  |
|          | <i>Pediococcus</i>   | 20.83±2.83 | 11.46±2.66 | 8.30±7.84   | 1.46±0.26 | 1.13±0.73  | 0.74±0.16  |
|          | <i>Weissella</i>     | 31.83±8.76 | 24.34±6.78 | 10.18±11.14 | 3.80±1.39 | 0.51±0.11  | 2.10±0.62  |
|          | <i>Others</i>        | 16.19±5.08 | 33.2±5.55  | 7.74±3.90   | 6.81±1.25 | 3.18±0.63  | 5.64±2.47  |
|          | <i>Aspergillus</i>   | 8.31±2.71  | 6.38±1.18  | 0.44±0.04   | 0.15±0.15 | 9.18±4.02  | 0.14±0.03  |
|          | <i>Candida</i>       | 5.89±1.37  | 5.49±0.68  | 1.41±0.19   | 0.15±0.08 | 0.62±0.33  | 0.18±0.04  |
| Fungi    | <i>Millerozyma</i>   | 0.30±0.33  | 0.16±0.10  | 0.01±0.00   | 0.02±0.01 | 0.37±0.36  | 0.07±0.02  |
|          | <i>Pichia</i>        | 2.73±0.87  | 2.34±0.61  | 0.55±0.09   | 2.68±1.19 | 3.48±2.80  | 3.04±0.99  |

|                         |            |            |            |            |            |            |
|-------------------------|------------|------------|------------|------------|------------|------------|
| <i>Rhizopus</i>         | 17.38±1.58 | 8.87±3.87  | 4.04±1.63  | 0.72±0.61  | 11.01±4.07 | 0.62±0.20  |
| <i>Saccharomyces</i>    | 2.61±0.67  | 31.72±7.54 | 58.73±4.17 | 89.98±0.89 | 52.92±6.40 | 89.17±2.74 |
| <i>Saccharomycopsis</i> | 58.13±3.30 | 35.27±4.11 | 33.09±5.29 | 5.74±2.22  | 18.32±7.65 | 6.23±2.87  |
| <i>Others</i>           | 4.66±0.68  | 9.77±5.64  | 1.73±0.11  | 0.56±0.08  | 4.10±0.57  | 0.55±0.16  |

Table S7. The concentration of metabolites in the baijiu fermentation

| Category | Compounds | Content (mg/g DW) |            |            |            |            |
|----------|-----------|-------------------|------------|------------|------------|------------|
|          |           | FG00              | FG03       | FG05       | FG10       | FG15       |
| alcohols | ethanol   | 51.81±4.84        | 211.1±8.25 | 186.5±6.82 | 157.1±6.19 | 144.3±5.88 |

Table S8. The ethanol formation catalyzed by various mixtures of key carbohydrate hydrolases

| Run | Content (mg/g starch) |      | Ethanol (mg/L) |
|-----|-----------------------|------|----------------|
|     | GH13                  | GH15 |                |



|    |      |      |            |
|----|------|------|------------|
| 1  | 0.10 | 0.38 | 415.4±7.83 |
| 2  | 0.06 | 0.44 | 478.5±7.98 |
| 3  | 0.12 | 0.22 | 405.5±8.10 |
| 4  | 0.06 | 0.22 | 388.7±6.99 |
| 5  | 0.06 | 0.22 | 389.4±8.55 |
| 6  | 0.02 | 0.08 | 218.0±8.71 |
| 7  | 0.06 | 0.22 | 387.4±8.82 |
| 8  | 0.10 | 0.08 | 321.8±8.10 |
| 9  | 0.06 | 0.22 | 374.3±9.81 |
| 10 | 0.00 | 0.22 | 373.4±8.36 |
| 11 | 0.06 | 0.02 | 343.0±7.37 |
| 12 | 0.02 | 0.38 | 397.0±8.82 |
| 13 | 0.06 | 0.22 | 380.5±7.79 |

---

Table S9. The ethanol formation catalyzed by a mixture of GH13 and GH15 (in a ratio of 1:6, w/w)

| Time (h) | Content (mg/L) |
|----------|----------------|
| 24       | 158.7±4.99     |
| 48       | 305.3±7.90     |
| 72       | 435.8±6.80     |

## Supplemental Figure Legends

Fig. S1 Profiles of Chinese Chixiang-style *Jiuqu* and baijiu production. In *Jiuqu* preparations, raw materials (rice, soybean) are stewed for 1 h under 0.1-0.2 MPa. Cooked materials are cooled to 30 °C, and mixed with caky balls (inoculated with strains). Mixed materials are shaped to bricks, and transferred into a making-house. The bricks are fermented for 7 days under 30-40 °C. Matured *Jiuqu* bricks are stored for two weeks, and smashed to powder for baijiu fermentation. In baijiu fermentation, raw materials (rice) are stewed for 30 min under 0.1-0.2 MPa, and cooled to 30 °C. Cooked rice are mixed with *Jiuqu* powder and other materials (water). Mixed materials are transferred into a 50 m<sup>3</sup> silo, and fermented for 15 days under 30-35 °C. Then the mash is distilled to make liquors.

Fig. S2 Sample collections in Chinese Chixiang-style baijiu production. In *Jiuqu* samples collection, we tracked 3 *Jiuqu* making-houses produced in 7, 8 and 9 July, 2017. Each house was an independent batch. We selected three biological samples of *Jiuqu* powder, after storage and ready for baijiu fermentation. In baijiu fermentation, we tracked three silos that used corresponding *Jiuqu* samples. Fermented samples were collected from three points (1, 2 and 3) at the upper, middle and bottom layer (“a”, “b” and “c”) in every fermentation silo. We selected fermented samples at 0, 3, 5, 10 and 15 days.

Fig. S3 Phylogenetic tree of identified GH13, GH15 in baijiu fermentation and the commercial ones for Central Composite analysis.

Fig. S4 Dynamic of isolated strains, enzymatic activity, and physicochemical indexes by the culture-dependent method. Growth curve of *Rhizopus microsporus* (a), *Lactobacillus fermentum* and *Lactobacillus helveticus* (c). Dynamic of saccharifying activity (b) and pH (d).

Fig. S5 Dominant microbial compositions at species across *Jiuqu* and fermented samples.

Fig. S1

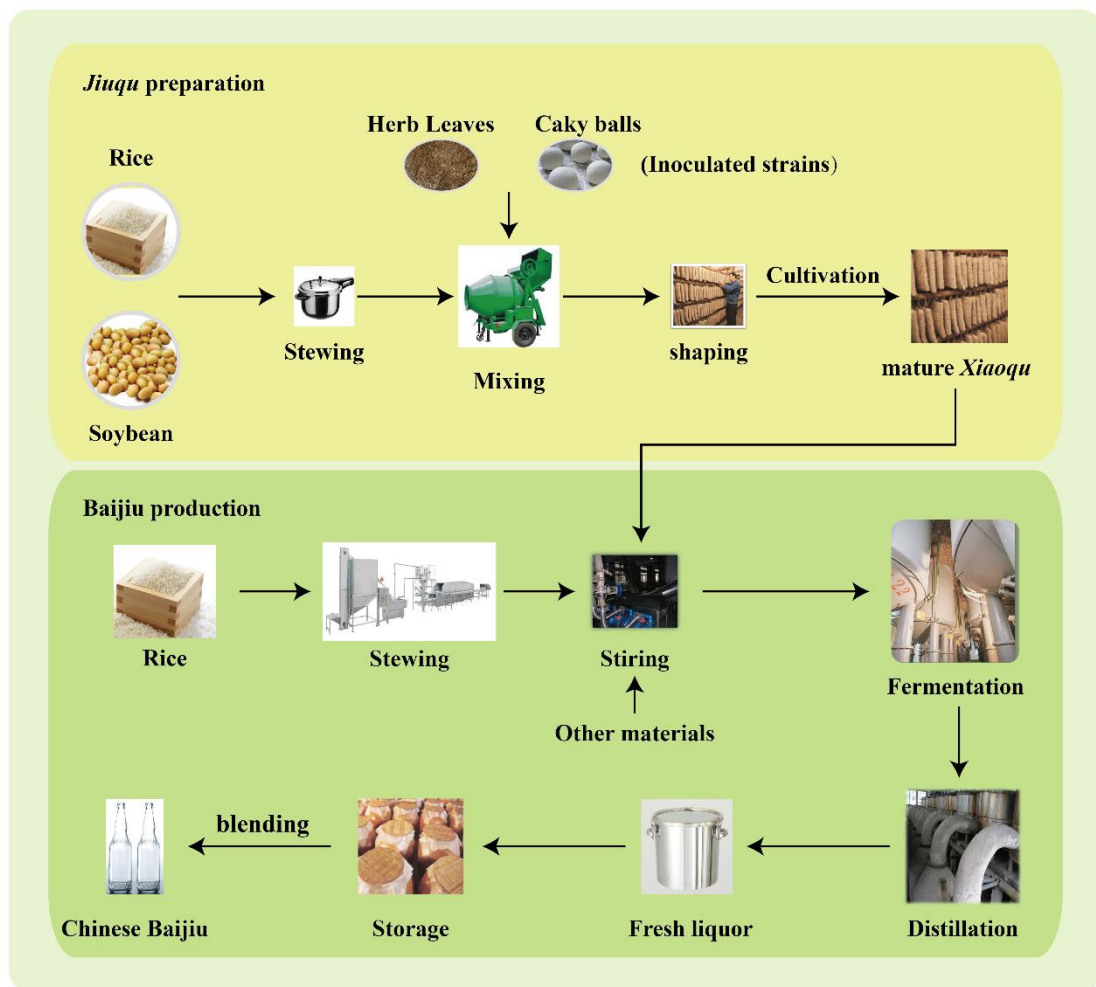

Fig. S2

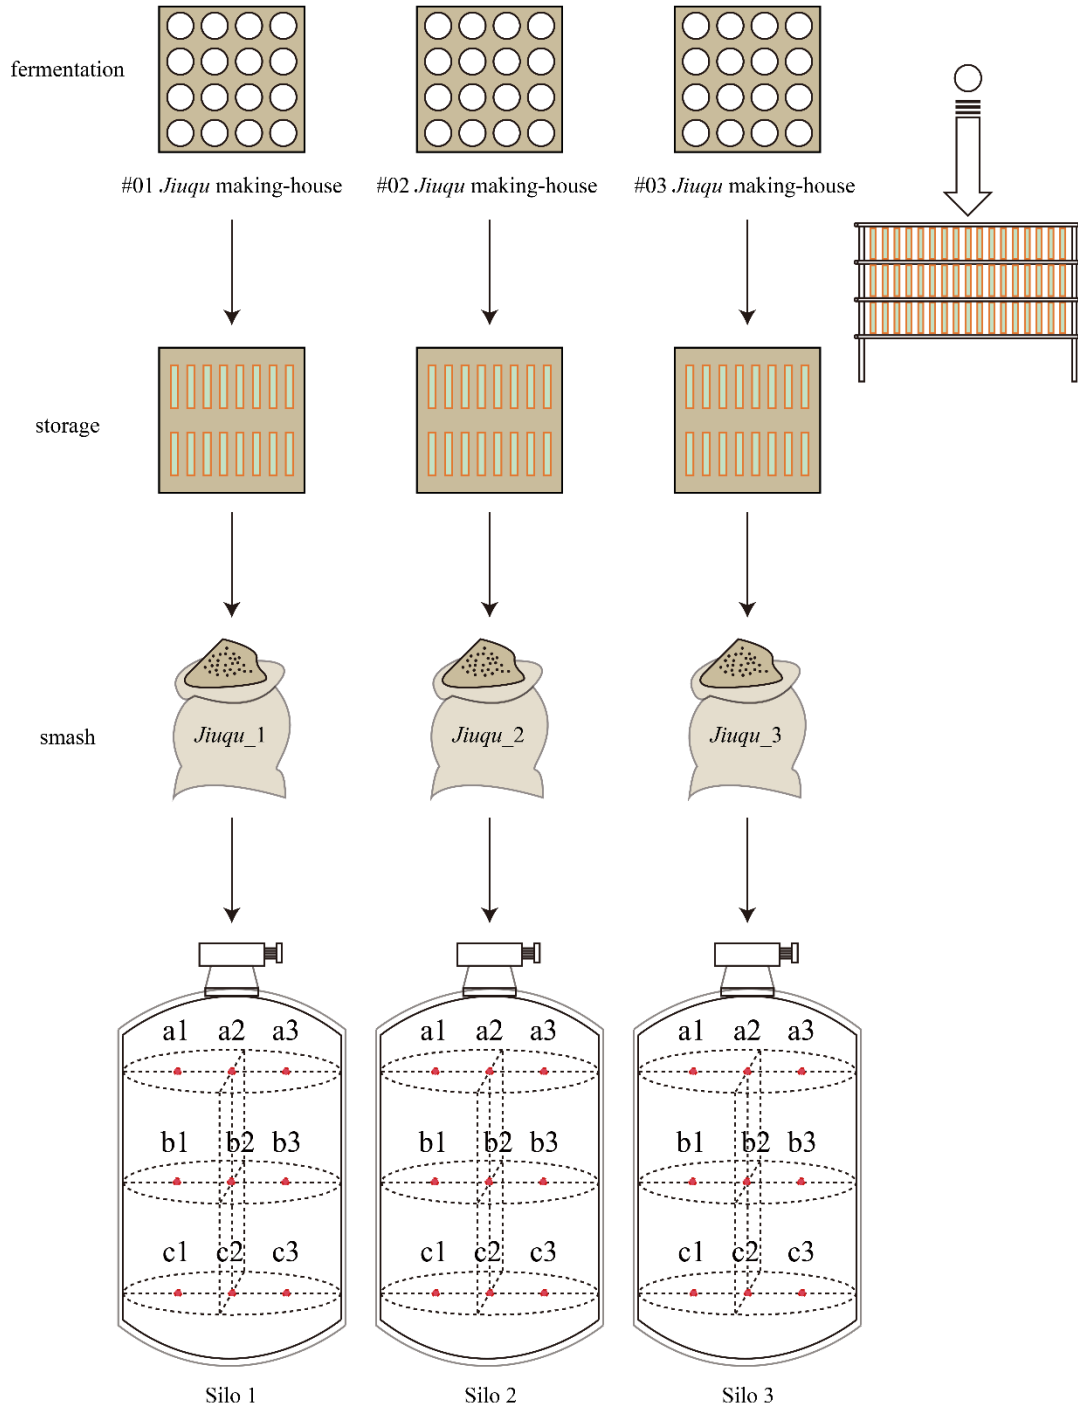

Fig. S3

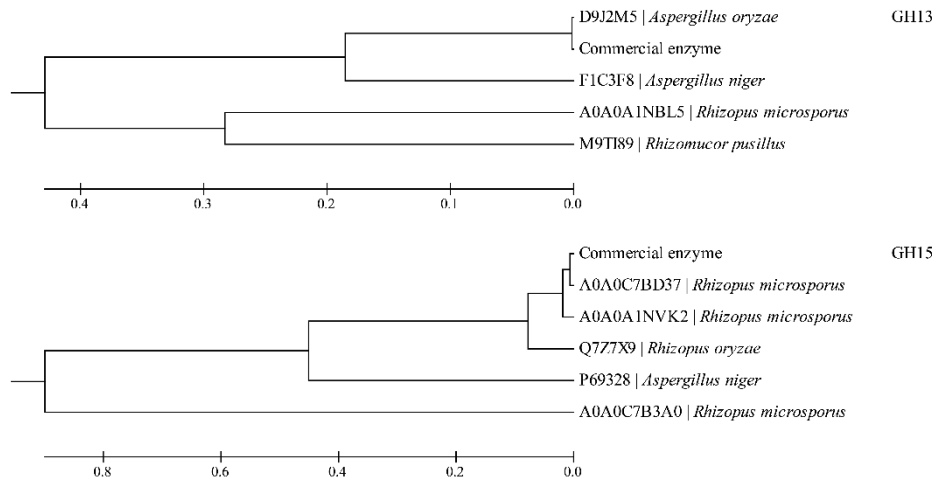

Fig. S4

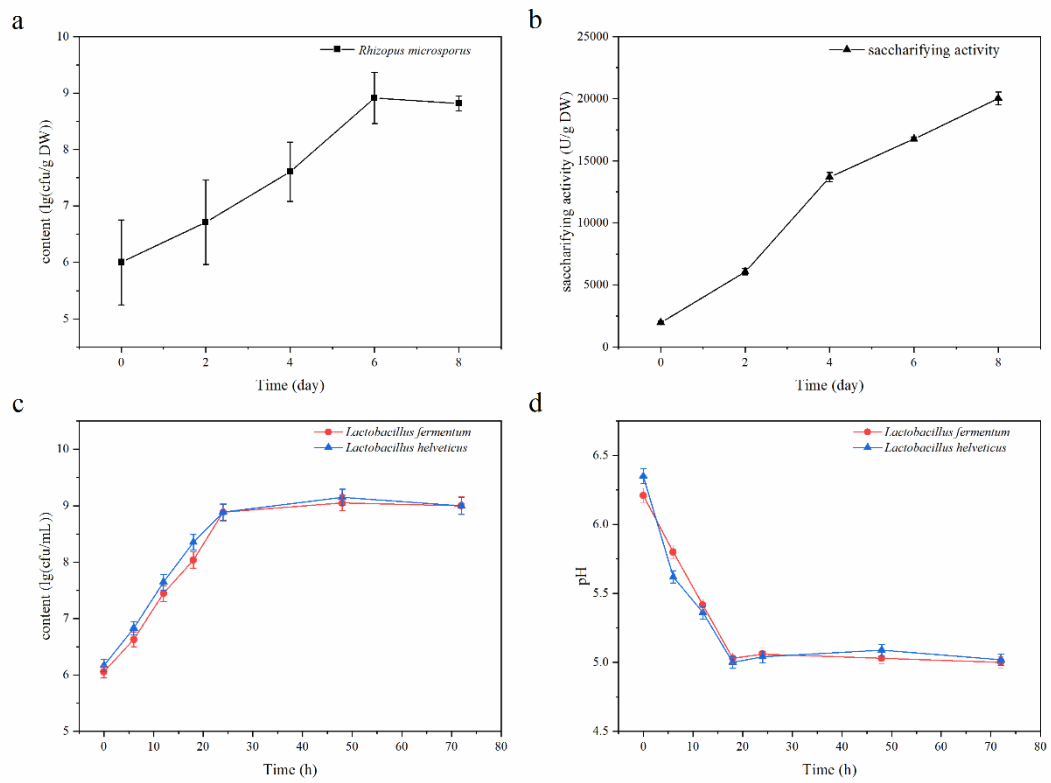



Fig. S5

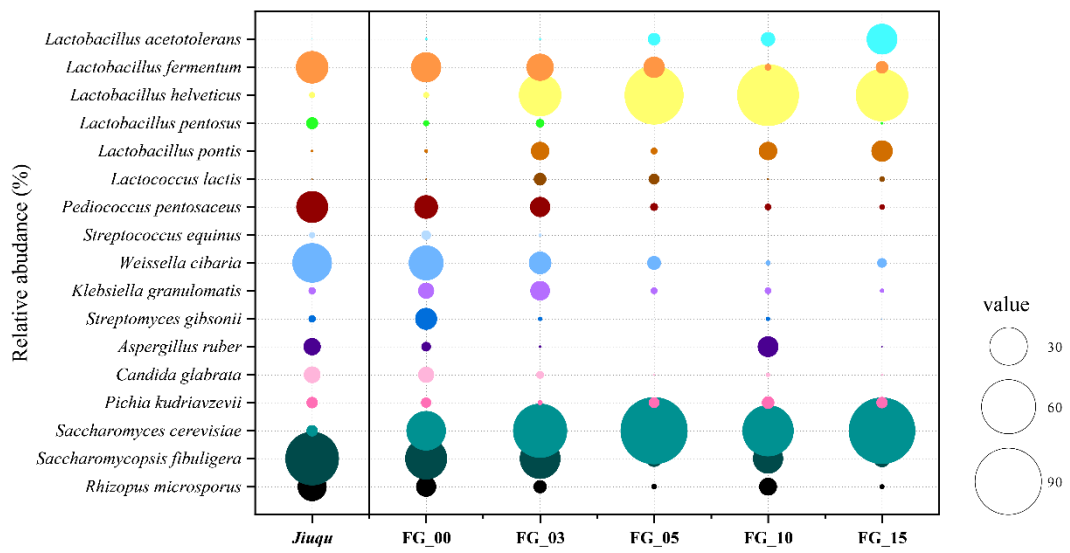

Supplement: AEM.00013-20-s0001.pdf [file AEM.00013-20-s0001.pdf]
